# Supplementary material for: Evidence of oriented attachment in the growth of functionalized ZnTe nanoparticles for potential applications in bio-imaging
Source: Royal Society of Chemistry journal article supplement (doi:10.1039/c4nj01183j), 2014-01-01
Supplement: c4nj01183j1.pdf [file c4nj01183j1.pdf]

## Supporting data- Evidence of oriented attachment in the growth of functionalized ZnTe nanoparticles for potential applications in bio-imaging

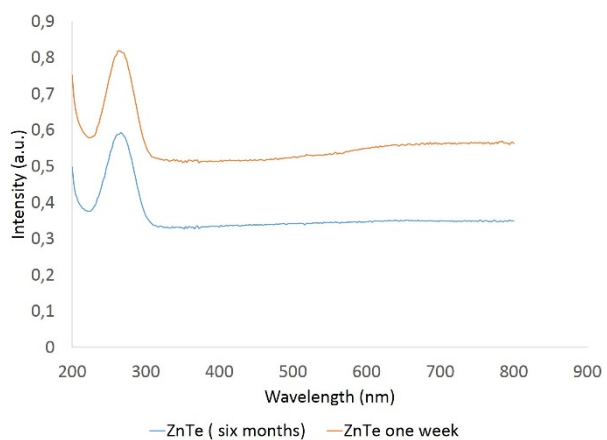

Figure 1. UV absorption properties of cysteine capped ZnTe nanoparticles over a six months period

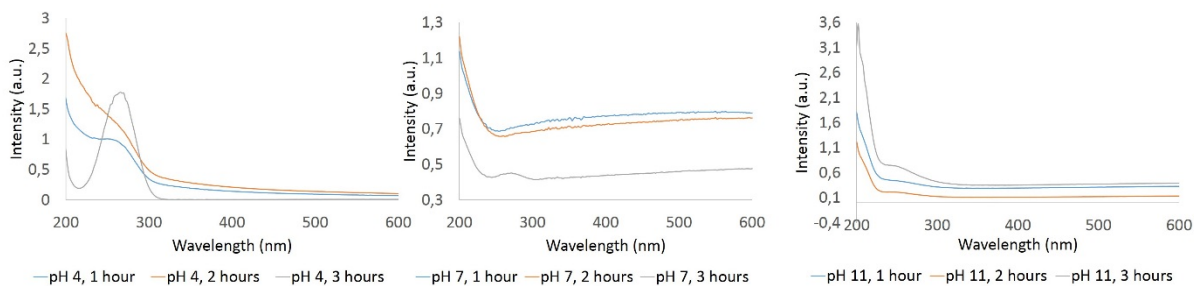

Figure 2. Absorption properties of ZnTe nanoparticles under the influence of varying pH and time conditions.

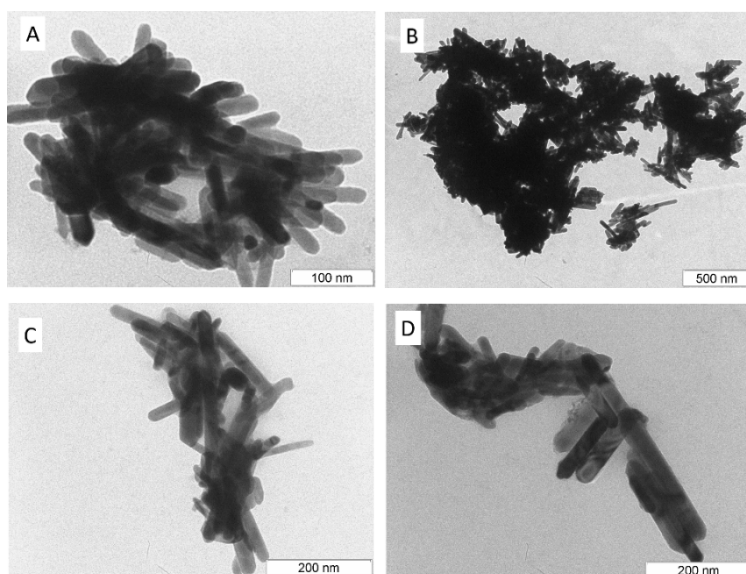

Figure 3. TEM micrographs of cysteine capped ZnTe nanoparticles at pH 4, 24 hour interval.
